# Supplementary material for: Studies in an Early Development Window Unveils a Severe HSC Defect in both Murine and Human Fanconi Anemia
Source: PubMed Central journal article supplement — Stem Cell Reports. 2018 Oct 25;11(5):1075–91. doi: 10.1016/j.stemcr.2018.10.001 (PMC6234961; doi:10.1016/j.stemcr.2018.10.001), 2018-10-25
Supplement: mmc1.pdf [file mmc1.pdf]

**Stem Cell Reports, Volume 11**

**Supplemental Information**

**Studies in an Early Development Window Unveils a Severe HSC Defect  
in both Murine and Human Fanconi Anemia**

**Carine Domenech, Loïc Maillard, Alix Rousseau, Fabien Guidez, Laurence Petit, Marika Pla, Denis Clay, Fabien Guimiot, Sandra Sanfilippo, Sebastien Jacques, Pierre de la Grange, Noémie Robil, Jean Soulier, and Michèle Souyri**

## Supplemental Information

### Studies in an early development window unveil a severe HSC defect in both murine and human Fanconi anemia

Carine Domenech<sup>1,2,3,4,5</sup>, Loïc Maillard<sup>1,2,3,4</sup>, Alix Rousseau<sup>4,6</sup>, Fabien Guidez<sup>3,4</sup>, Laurence Petit<sup>1,2</sup>, Marika Pla<sup>3,4</sup>, Denis Clay<sup>7,8</sup>, Fabien Guimiot<sup>9</sup>, Sandra Sanfilippo<sup>1,2,10</sup>, Sebastien Jacques<sup>11</sup>, Pierre de la Grange<sup>12</sup>, Noémie Robil<sup>12</sup>, Jean Soulier<sup>4,6</sup> and Michèle Souyri<sup>\*1,2,3,4</sup>

### Inventory of Supplemental Informations

- **Table S1, related to Figure 6 and transcriptome analysis section in the Results**, reports all the GO processes and genes associated (DAVID, KEGG and reactome analysis) in genes in *Fancg*<sup>-/-</sup> E12.5 Pl and E14.5 FL and human FA FL HSCs.
- **Table S2, related to Figure 6 and transcriptome analysis section in the Results**, shows expression of few cell cycle regulators in E12.5 FL and E14.5 FL *Fancg*<sup>-/-</sup> HSCs and in human FA FL HSCs.
- **Table S3, related to Figure 6 and transcriptome analysis section in the Results**, shows transcriptional regulators and markers important for HSC development and maintenance in E12.5 FL and E14.5 FL *Fancg*<sup>-/-</sup> HSCs and in human FA FL HSCs.
- **Figure S1, related to Figure 2**, shows that the percentage of HSC-enriched cells in *Fancg*<sup>-/-</sup> E12.5 Pl or FL, and E14.5 FL is identical to that detected in WT Pl or FL.
- **Figure S2, related to Figure 3**, reports long-term primary and secondary hematopoietic reconstitution ability of E14.5 FL LSA HSCs.
- **Figure S3**, reports analysis of apoptosis in *Fancg*<sup>-/-</sup> and WT E12.5 FL LSA HSC population (**related to Figure 4**), and qPCR verification of the level of expression of few cell cycle and HSC-related genes (**related to Figure 6 and Tables S2 and S3**), and analysis of phospho-P53 in HCs and HSCs populations from *Fancg*<sup>-/-</sup> and WT E12.5 FL (**related to Table S2**).

Supplemental Figures and Legends

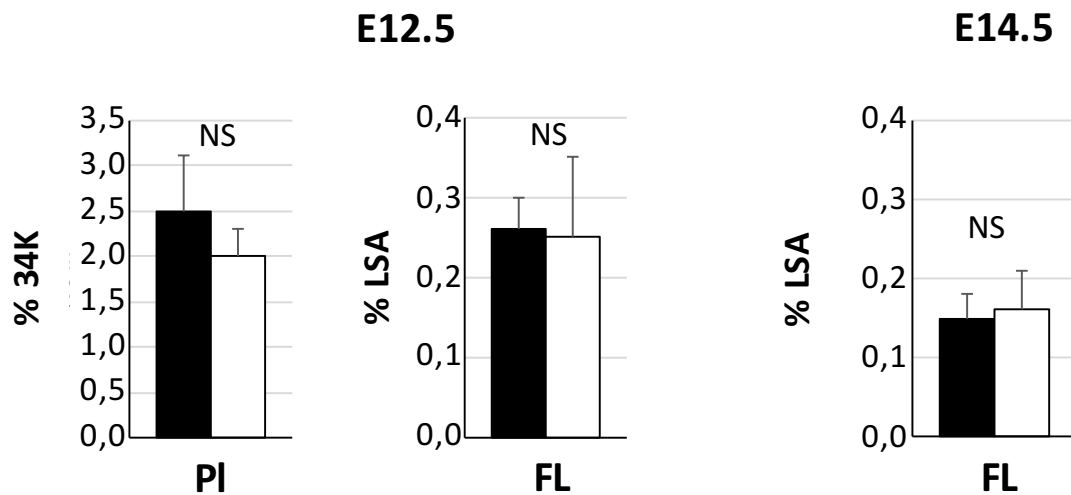

**Figure S1. Related to Figure 2. Percentage of HSC-enriched populations.**

Percentage of HSC-enriched cells in the PI (34K, n=9 - distinct experiments) and FL (LSA, n=7 - distinct experiments) at E12.5 and in the FL (LSA, n=6 - distinct experiments) at E14.5.

Black bars: WT; White bars: *Fancg*<sup>-/-</sup>.

NS: not significant.

Error bars correspond to standard deviation (SD).

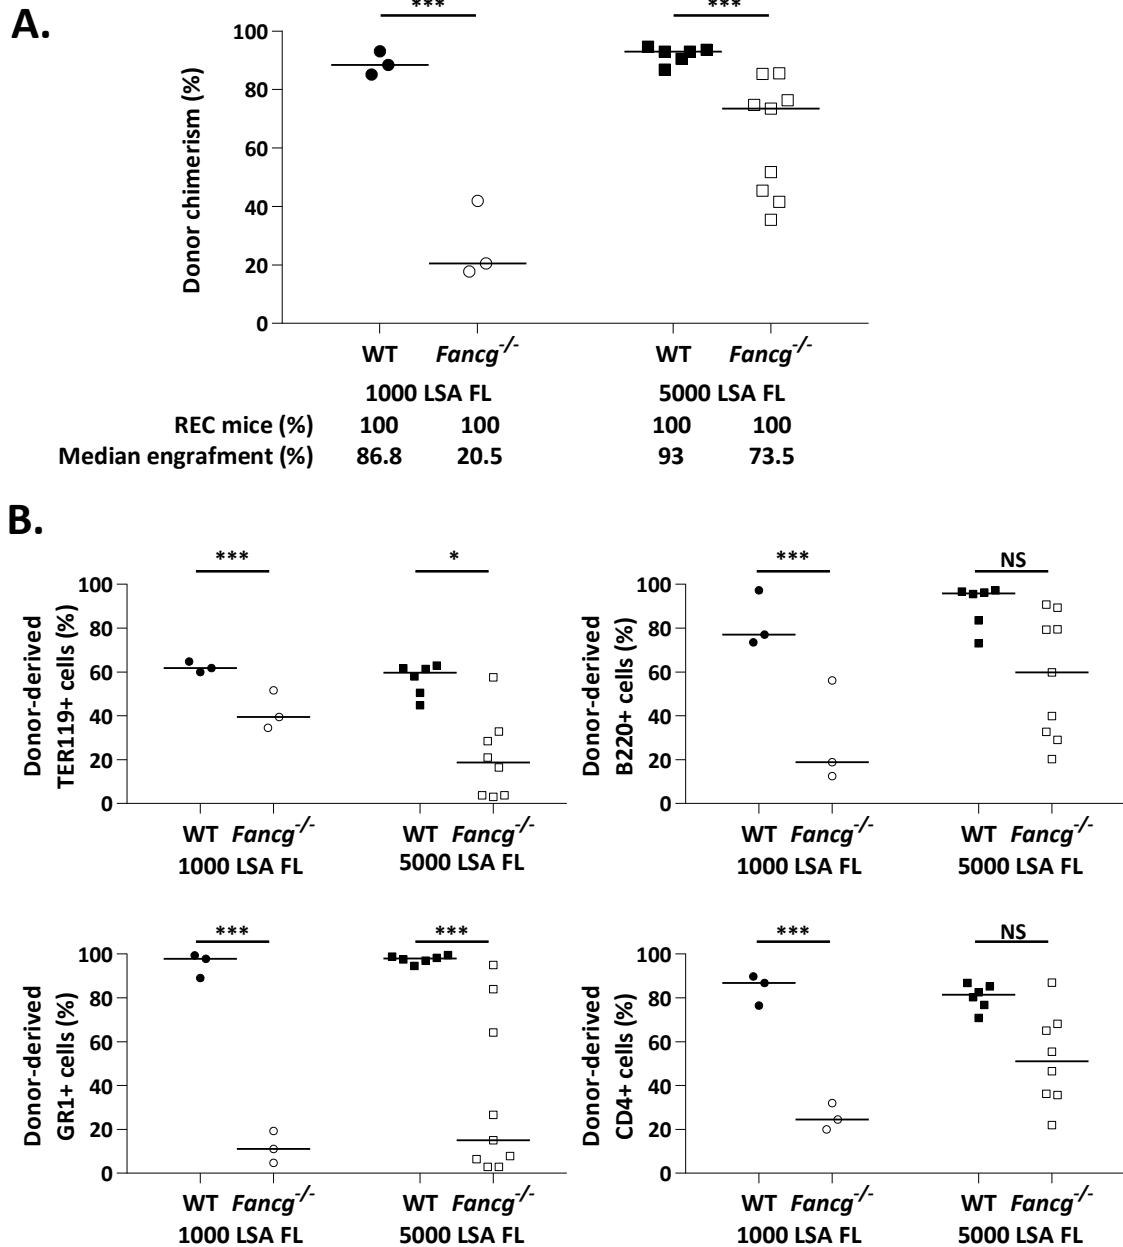

**Figure S2. Related to Figure 3. High LTR ability defect and impaired myeloid potential of E14.5 *Fancg*<sup>-/-</sup> FL LSA HSCs.** (A) CD45.2 chimerism in the blood of primary recipients 16- to 20-week post injection of  $1.10^3$  (circles) or  $5.10^3$  (squares) WT (black) or *Fancg*<sup>-/-</sup> (white) LSA cells. (B) Analysis of the BM hematopoietic content of primary recipients transplanted with LSA cells, expressed as a percentage of CD45.2<sup>+</sup> erythroid (TER119), myeloid (GR1), B lymphoid (B220) and T-lymphoid (CD4) cells. Circles:  $1.10^3$  LSA injected; squares:  $5.10^3$  LSA injected; black: WT FL or PI cells; White: *Fancg*<sup>-/-</sup> FL or PI cells. (C) Secondary transplantations. Engraftment was considered as positive when CD45.2 chimerism in the blood was >5%. \*\*\* p<0.001; \* p<0.05; NS: not significant.

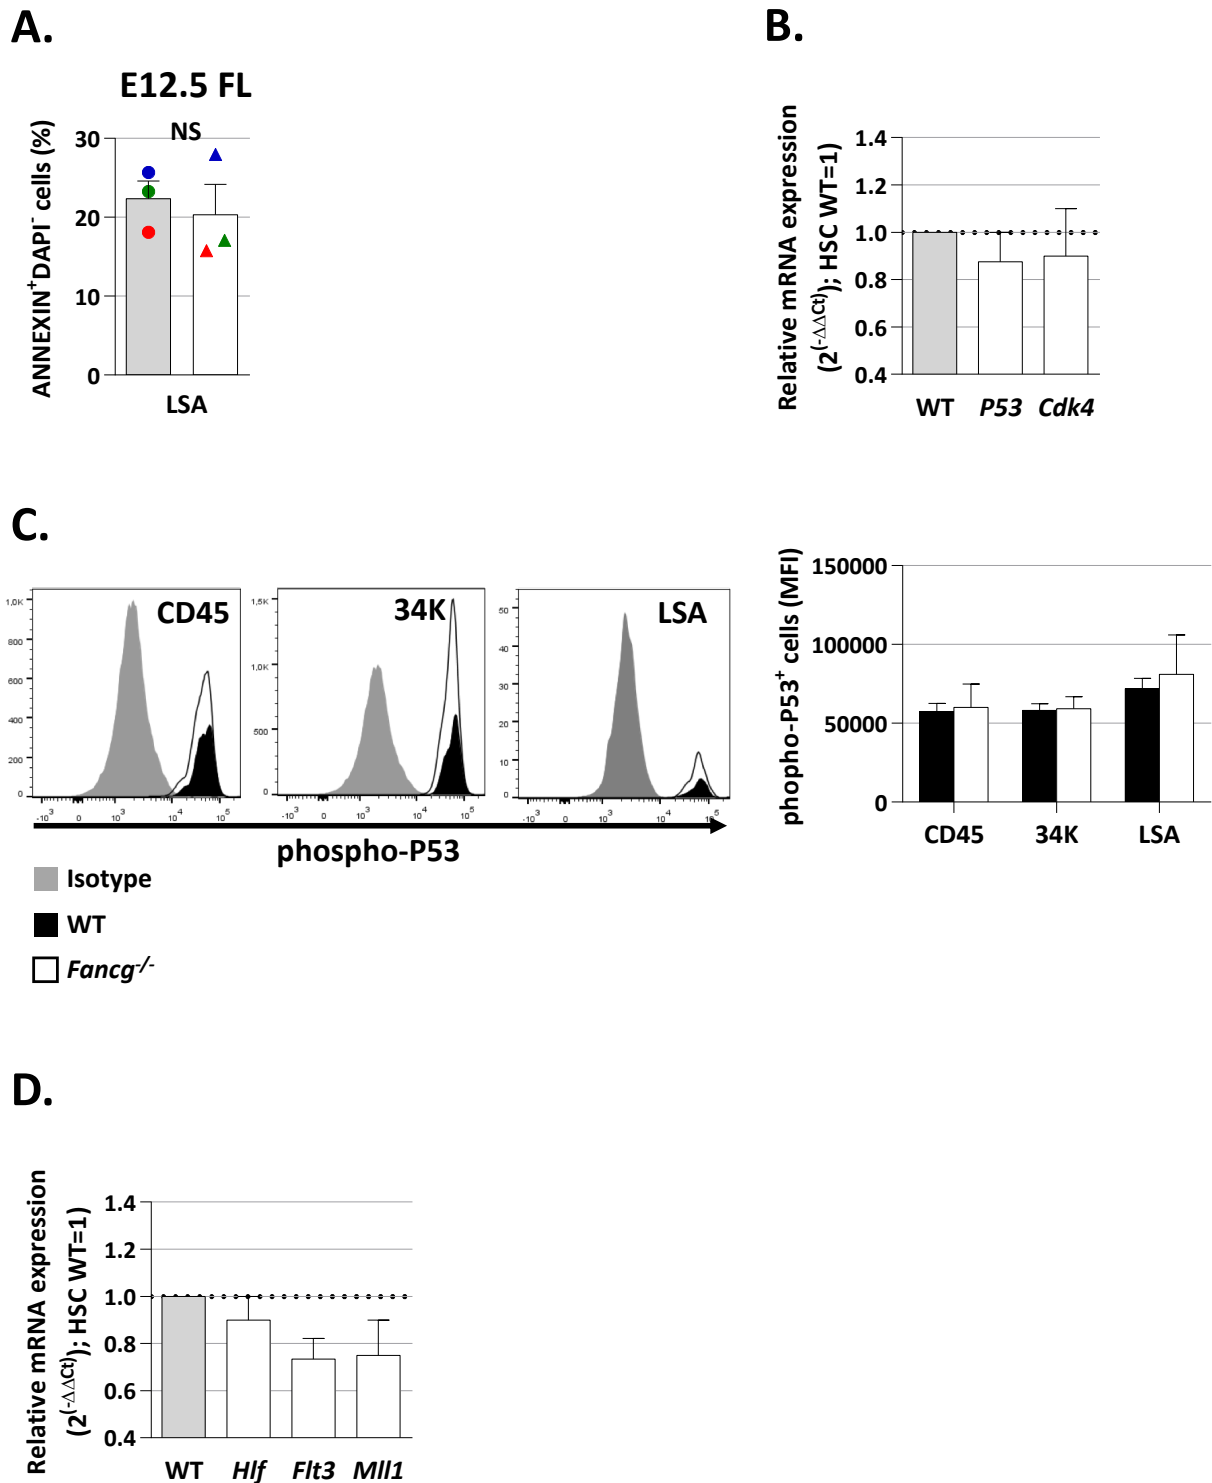

**Figure S3. Related to Figure 4 and Figure 6. Annexin, p53, and qPCR.** (A) ANNEXIN<sup>+</sup>DAPI<sup>-</sup> LSA cells in E12.5 FL (n=3, dots of same colors are related to the same experiment), measured by flow-cytometry. Grey bars: WT; White bars: *Fancg*<sup>-/-</sup>. NS: not significant. (B, D) qPCR of relative mRNA expression of (B) cell cycle related genes (*P53*, *Cdk4*) and (D) HSC related genes (*Hlf*, *Flt3*, *Mll1*) in E12.5 FL HSCs. Grey bars: WT; White bars: *Fancg*<sup>-/-</sup>. (C) Left panel, histograms of phospho-P53 expression in CD45<sup>+</sup>, 34K and LSA in E12.5 FL. Right panel, MFI of phospho-P53 in CD45<sup>+</sup>, 34K and LSA in E12.5 FL. Grey: Isotype; Black: WT; White: *Fancg*<sup>-/-</sup>, n=3. Error bars correspond to standard deviation (SD).

## Supplemental Tables

**Table S1. Related to Figure 6.** GO processes for up- and down-regulated genes in *Fancg*<sup>-/-</sup> E12.5 Pl and E14.5 FL and human FA FL HSCs determined by DAVID, KEGG and Reactome pathways (excel file).

**Table S2. Related to Figure 6.** Expression of cell cycle regulators in E12.5 FL and E14.5 FL *Fancg*<sup>-/-</sup> HSCs and in human FA FL HSCs

|                                                  | MOUSE        |                     | Type(s)                 | E12.5 FL HSC <i>Fancg</i> <sup>-/-</sup> vs WT E14.5 FL HSC <i>Fancg</i> <sup>-/-</sup> vs WT |             |            | HUMAN    | Hu FL CSH FA vs N |               |            |          |
|--------------------------------------------------|--------------|---------------------|-------------------------|-----------------------------------------------------------------------------------------------|-------------|------------|----------|-------------------|---------------|------------|----------|
|                                                  | EntrezGeneID | Symbol              |                         | p-value                                                                                       | Fold-Change | p-value    |          | Fold-Change       | EntrezGene ID | Symbol     | p-value  |
| <b>positive regulators</b><br><b>cell cycle</b>  | 12534        | <i>Cdk1</i>         | kinase (G2/M)           | 0.0265882                                                                                     | -1.95099    | 0.523601   | 1.19537  | 983               | <i>CDK1</i>   | 0.049633   | -2.34181 |
|                                                  | 12566        | <i>Cdk2</i>         | kinase (G1/S and S)     | 0.244252                                                                                      | -1.47903    | 0.861626   | 1.05902  | 1017              | <i>CDK2</i>   | 0.0286387  | -1.50515 |
|                                                  | 12567        | <i>Cdk4</i>         | kinase (G1)             | 0.061724                                                                                      | -2.40922    | 0.638159   | 1.23345  | 1019              | <i>CDK4</i>   | 0.137186   | 1.44103  |
|                                                  | 12571        | <i>Cdk6</i>         | kinase (G1)             | 0.068171                                                                                      | -2.01864    | 0.624994   | 1.196    | 1021              | <i>CDK6</i>   | 0.413603   | -2.13399 |
|                                                  | 12530        | <i>Cdc25a</i>       | phosphatase             | 0.070752                                                                                      | -2.0569     | 0.256828   | 1.54979  | 993               | <i>CDC25A</i> | 0.899374   | -1.11772 |
|                                                  | 12545        | <i>Cdc7</i>         | kinase                  | 0.00571329                                                                                    | -1.52194    | 0.278122   | 1.15937  | 8317              | <i>CDC7</i>   | 0.0184651  | -10.022  |
| <b>positive regulators</b><br><b>G1/S</b>        | 72391        | <i>Cdkn3</i>        | phosphatase             | 0.0123337                                                                                     | 1.80254     | 0.163852   | -1.35654 | 1033              | <i>CDKN3</i>  | 0.163052   | -4.89689 |
|                                                  | 26965        | <i>Cull1</i>        | enzyme                  | 0.940323                                                                                      | 1.02756     | 0.865013   | 1.06371  | 8454              | <i>CUL1</i>   | 0.0227364  | -2.8474  |
|                                                  | 26554        | <i>Cul3</i>         | enzyme                  | 0.0762675                                                                                     | -1.38092    | 0.81476    | -1.04139 | 8452              | <i>CUL3</i>   | 0.00796146 | -8.41682 |
|                                                  | 27214        | <i>Dbp4</i>         | kinase                  | 0.100316                                                                                      | -1.58151    | 0.48082    | -1.20889 | 10926             | <i>DBF4</i>   | 0.422796   | -1.40464 |
|                                                  | 27401        | <i>Skp2</i>         | enzyme                  | 0.29602                                                                                       | -1.32127    | 0.505338   | 1.19212  | 6502              | <i>SKP2</i>   | 0.0341479  | -1.60341 |
|                                                  | 12575        | <i>Cdkn1a (p21)</i> | kinase                  | 0.19388                                                                                       | -1.29206    | 0.00169713 | 2.03639  | 1026              | <i>CDKN1A</i> | 0.627505   | 1.69843  |
| <b>negative regulators</b><br><b>G1 and G1/S</b> | 12576        | <i>Cdkn1b (p27)</i> | kinase                  | 0.242822                                                                                      | -1.33249    | 0.935519   | -1.01964 | 1027              | <i>CDKN1B</i> | 0.269765   | -1.56777 |
|                                                  | 12577        | <i>Cdkn1c (p57)</i> | other                   | 0.976823                                                                                      | -1.0031     | 0.0818228  | -1.21492 | 1028              | <i>CDKN1C</i> | 0.0528907  | 1.40915  |
|                                                  | 12578        | <i>Cdkn2a (p16)</i> | transcription regulator | 0.0138273                                                                                     | 1.51116     | 0.481858   | -1.11356 | 1029              | <i>CDKN2A</i> | 0.0579896  | 1.67837  |
|                                                  | 12580        | <i>Cdkn2c (p18)</i> | transcription regulator | 0.169685                                                                                      | 1.64242     | 0.78489    | 1.10051  | 1031              | <i>CDKN2C</i> | 0.993546   | -1.00365 |
|                                                  | 12581        | <i>Cdkn2d (p19)</i> | transcription regulator | 0.328384                                                                                      | -1.68009    | 0.901609   | 1.06678  | 1032              | <i>CDKN2D</i> | 0.163026   | 1.95938  |
|                                                  | 22059        | <i>Tp53</i>         | transcription regulator | 0.020398                                                                                      | -2.28048    | 0.329335   | 1.38025  | 7157              | <i>TP53</i>   | 0.0357746  | -4.79119 |
| <b>DNA Damage Response</b>                       | 12649        | <i>Chek1</i>        | kinase                  | 0.101596                                                                                      | -1.71194    | 0.62796    | 1.16524  | 1111              | <i>CHEK1</i>  | 0.476714   | -1.3565  |
|                                                  | 11920        | <i>Atm</i>          | kinase                  | 0.0196423                                                                                     | -1.36019    | 0.235506   | 1.15751  | 472               | <i>ATM</i>    | 0.0146579  | -4.59635 |
|                                                  | 245000       | <i>Atr</i>          | kinase                  | 0.295867                                                                                      | -1.155      | 0.155405   | 1.21996  | 545               | <i>ATR</i>    | 0.0882164  | -2.72483 |
|                                                  | 26416        | <i>Mapk14</i>       | kinase                  | 0.100101                                                                                      | -1.78115    | 0.870933   | -1.05612 | 1432              | <i>MAPK14</i> | 0.155265   | -1.71515 |

*italics* : p-value > 0.05

**Table S3. Related to Figure 6.** Expression of transcriptional regulators and markers important for HSC development and maintenance in E12.5 FL and E14.5 FL *Fancg*<sup>-/-</sup> HSCs and in human FA FL HSCs

| MOUSE<br>EntrezGeneID | Symbol             | Type(s)                 | E12.5 FL HSC <i>Fancg</i> <sup>-/-</sup> vs WT |             | E14.5 FL HSC <i>Fancg</i> <sup>-/-</sup> vs WT |             | HUMAN<br>Entrez Gene ID |                   | Hu FL HSC FA vs N |          |
|-----------------------|--------------------|-------------------------|------------------------------------------------|-------------|------------------------------------------------|-------------|-------------------------|-------------------|-------------------|----------|
|                       |                    |                         | p-value                                        | Fold-Change | p-value                                        | Fold-Change | Symbol                  | p-value           | Fold-Change       |          |
| 17863                 | <i>Myb</i>         | transcription regulator | 0.551/93                                       | -1.26695    | 0.764629                                       | 1.12565     | 4602                    | <i>MYB</i>        | 0.72529           | -1.82171 |
| 14461                 | <i>Gata2</i>       | transcription regulator | 0.000671183                                    | -1.63055    | 0.139091                                       | 1.19841     | 2624                    | <i>GATA2</i>      | 0.839851          | 1.55964  |
| 15405                 | <i>Hoxa9</i>       | transcription regulator | 0.791312                                       | 1.04128     | 0.132993                                       | -1.2687     | 3205                    | <i>HOXA9</i>      | 0.0187017         | 3.59795  |
| 217082                | <i>Hlf</i>         | transcription regulator | 0.00182585                                     | -1.94873    | 0.394645                                       | -1.16941    | 3131                    | <i>HLF</i>        | 0.400577          | -1.89707 |
| 17268                 | <i>Mets1</i>       | transcription regulator | 0.00111461                                     | -1.83682    | 0.253189                                       | 1.19943     | 4211                    | <i>MEIS1</i>      | 0.209917          | -2.5383  |
| 16909                 | <i>Lmo2</i>        | transcription regulator | 0.041514                                       | -1.67244    | 0.74554                                        | 1.07963     | 4005                    | <i>LMO2</i>       | 0.0156993         | -1.60739 |
| 12394                 | <i>Runx1</i>       | transcription regulator | 0.0226876                                      | -2.04944    | 0.196683                                       | 1.46733     | 861                     | <i>RUNX1</i>      | 0.77931           | -1.62861 |
| 21349                 | <i>Tal1</i>        | transcription regulator | 0.876997                                       | -1.03302    | 0.826557                                       | -1.04709    | 6886                    | <i>TALI</i>       | 0.013999          | -1.40094 |
| 14056                 | <i>Ezh2</i>        | transcription regulator | 0.242662                                       | -1.2982     | 0.851762                                       | 1.0417      | 2146                    | <i>EZH2</i>       | 0.0680242         | -1.86875 |
| 12393                 | <i>Runx2</i>       | transcription regulator | 0.0705636                                      | -1.26931    | 0.69666                                        | 1.05007     | 860                     | <i>RUNX2</i>      | 0.427646          | -1.71222 |
| 14011                 | <i>Etv6</i>        | transcription regulator | 0.0481506                                      | -2.1165     | 0.703837                                       | 1.14525     | 2120                    | <i>ETV6</i>       | 0.149461          | -3.75014 |
| 13876                 | <i>Erg</i>         | transcription regulator | 0.00811629                                     | -2.00213    | 0.651597                                       | -1.11153    | 2078                    | <i>ERG</i>        | 0.951723          | 1.02782  |
| 17128                 | <i>Smad4</i>       | transcription regulator | 0.00303934                                     | -2.15952    | 0.6264                                         | 1.11578     | 4089                    | <i>SMAD4</i>      | 0.0758063         | -3.40223 |
| 21423                 | <i>Tcf3 (E2a)</i>  | transcription regulator | 0.0101073                                      | -1.85672    | 0.409928                                       | 1.19673     | 6929                    | <i>TCF3 (E2A)</i> | 0.976242          | -1.00542 |
| 20230                 | <i>Satb1</i>       | transcription regulator | 0.00000373983                                  | -1.9032     | 0.188524                                       | -1.13722    | 6304                    | <i>SATB1</i>      | 0.0455969         | -2.32733 |
| 14247                 | <i>Fli1</i>        | transcription regulator | 0.0210975                                      | -2.09813    | 0.600603                                       | 1.16741     | 2313                    | <i>FLI1</i>       | 0.305429          | -1.83813 |
| 17480                 | <i>Mpl</i>         | transmembrane receptor  | 0.00652311                                     | -2.59841    | 0.934073                                       | -1.02601    | 4352                    | <i>MPL</i>        | 0.772362          | -1.70948 |
| 16590                 | <i>Kit</i>         | transmembrane receptor  | 0.00876411                                     | -2.15246    | 0.996552                                       | 1.00113     | 3815                    | <i>KIT</i>        | 0.0279414         | -5.30959 |
| 14255                 | <i>Fh3</i>         | kinase                  | 0.0000856308                                   | -3.26137    | 0.678667                                       | 1.10044     | 2322                    | <i>FLT3</i>       | 0.0150671         | -11.4272 |
| 12490                 | <i>CD34</i>        | other                   | 0.0296424                                      | -1.77092    | 0.578961                                       | 1.1452      | 947                     | <i>CD34</i>       | 0.291241          | -2.26558 |
| 17064                 | <i>CD93</i>        | other                   | 0.0492916                                      | -1.5755     | 0.732869                                       | 1.07704     | 22918                   | <i>CD93</i>       | 0.743419          | -1.30972 |
| 12767                 | <i>Cxcr4</i>       | G-protein coupled recep | 0.0453386                                      | -2.00912    | 0.883063                                       | 1.04921     | 7852                    | <i>CXCR4</i>      | 0.00546894        | -2.60175 |
| 110454                | <i>Ly6a (Sca1)</i> | other                   | 0.525021                                       | -1.17961    | 0.869235                                       | -1.04344    |                         |                   |                   |          |
| 13435                 | <i>Dnmt3A</i>      | enzyme                  | 0.0000019344                                   | -1.81074    | 0.0054889                                      | 1.30033     | 1788                    | <i>DNMT3A</i>     | 0.194286          | -2.16926 |
| 13436                 | <i>Dnmt3B</i>      | enzyme                  | 0.00615053                                     | -3.07848    | 0.313937                                       | 1.44877     | 1789                    | <i>DNMT3B</i>     | 0.545676          | -1.53146 |
| 269966                | <i>NUP98</i>       | transporter             | 0.163985                                       | -1.71656    | 0.819614                                       | 1.08966     | 4928                    | <i>NUP98</i>      | 0.237552          | -2.46241 |
| 380669                | <i>Lin28b</i>      | other                   | 0.0117365                                      | -2.11293    | 0.377657                                       | 1.26962     | 389421                  | <i>LIN28B</i>     | 0.414911          | -2.09804 |
| 15364                 | <i>Hmga2</i>       | enzyme                  | 0.0219313                                      | -1.54098    | 0.191152                                       | 1.26183     | 8091                    | <i>HMG42</i>      | 0.0138053         | -3.28699 |

*italics* : *p-value* > 0.05



## Supplemental Experimental Procedures

### RT-qPCR

For RT-qPCR assay, RNA were reverse-transcribed in cDNA using SuperScript III Reverse Transcriptase kit (Invitrogen) according to manufacturer's protocol. qPCR was done using SYBR Green PCR master mix reagent (Applied Biosystems) on 7500 Fast RTPCR system (Applied Biosystems). Primers used for RT-qPCR assay are listed below.

| Target                    | Sens    | Primers 5'-3'             |
|---------------------------|---------|---------------------------|
| <b>Cell cycle markers</b> |         |                           |
| <i>P53</i>                | Forward | GAGGCCGGCTCTGAGTATACCA    |
|                           | Reverse | GGCAGGCACAAACACGAACC      |
| <i>Cdk4</i>               | Forward | CGGCCTGTGTCTATGGTCTG      |
|                           | Reverse | GAAGCAGGGGATCTTACGCT      |
| <b>HSCs markers</b>       |         |                           |
| <i>Hlf</i>                | Forward | GCAGCCGTCTACGTTTTCAA      |
|                           | Reverse | CAGGATGCTTTCTCACCTGC      |
| <i>Flt3</i>               | Forward | TGTCAGTAATGATTCTTGAGACCGT |
|                           | Reverse | GCACACTGGAGGTCTTCTGG      |
| <i>Mll1</i>               | Forward | GGCCCTGTTGAATTCTCGGA      |
|                           | Reverse | GGGAGCTTCGGGAAGGTATG      |
| <b>Housekeeping genes</b> |         |                           |
| <i>Gapdh</i>              | Forward | AGGTCGGTGTGAACGGATTTG     |
|                           | Reverse | TGTAGACCATGTAGTTGAGGTCA   |
